# Supplementary material for: Clinical Evaluation of BD Veritor SARS-CoV-2 and Flu A+B Assay for Point-Of-Care System
Source: PubMed Central journal article supplement (PMC9045085; doi:10.1128/spectrum.01807-21), 2022-04-12
Supplement: spectrum.01807-21-s0001.pdf [file spectrum.01807-21-s0001.pdf]

SUPPLEMENTAL INFORMATION  
TABLE S1**Table S1.** SARS-CoV-2 specimens collection sites.

| <b>Site</b>    | <b>City</b>    | <b>State</b> | <b>Enrollment</b> |
|----------------|----------------|--------------|-------------------|
| A              | Palm Springs   | FL           | 46                |
| B              | Savannah       | GA           | 94                |
| C              | Ft. Lauderdale | FL           | 80                |
| D <sup>a</sup> | Downers Grove  | IL           | 64                |
| E              | Chattanooga    | TN           | 11                |
| F              | St. Louis      | MO           | 3                 |
| <b>TOTAL</b>   |                |              | <b>298</b>        |

<sup>a</sup>The collection procedure was not consistent with the protocols utilized by other sites. The collection deviation was noted and therefore, the data was reported with and without this site.

TABLE S2

**Table S2.** List of discordant specimens.

| Specimen ID    | Veritor | Lyra | MAX | MAX Ct                |
|----------------|---------|------|-----|-----------------------|
| 1              | -       | +    | +   | N1: 29.06, N2: 29.48  |
| 2              | -       | +    | +   | N1: 26.38, N2: 29.48  |
| 3              | -       | +    | -   | N/A                   |
| 4              | -       | +    | +   | N1: 30.79, N2: 32.72  |
| 5              | -       | +    | +   | N1: 30.43, N2: 32.38  |
| 6              | -       | +    | +   | N1: 38.27, N2: 32.71  |
| 7              | -       | +    | +   | N1: 31.82, N2: 33.95  |
| 8              | -       | +    | +   | N1: 30.86, N2: 321.40 |
| 9 <sup>a</sup> | +       | -    | -   | N/A                   |

<sup>a</sup>Analysis of the Veritor Analyzer raw data demonstrated this specimen's results to be very close to the assay cut-off.

TABLE S3

**Table S3.** Comparison of Veritor SARS-CoV-2/Flu assay results with those from the Lyra SARS-CoV-2 assay, stratified by cycle threshold category, with and without D site.

| Without D Site<br>Veritor SARS-CoV-2 | Lyra SARS-CoV-2     |                      |
|--------------------------------------|---------------------|----------------------|
|                                      | Positive (Ct ≤ 30)  | Positive (Ct > 30)   |
| Positive                             | 42                  | 1                    |
| Negative                             | 0                   | 4                    |
| Total                                | 42                  | 5                    |
| PPA (95% CI)                         | 100% (91.6% - 100%) | 20.0% (3.6% - 62.4%) |

| All Sites<br>Veritor SARS-CoV-2 | Lyra SARS-CoV-2     |                     |
|---------------------------------|---------------------|---------------------|
|                                 | Positive (Ct ≤ 30)  | Positive (Ct > 30)  |
| Positive                        | 50                  | 2                   |
| Negative                        | 2                   | 6                   |
| Total                           | 52                  | 8                   |
| PPA (95% CI)                    | 100% (92.6% - 100%) | 100% (74.1% - 100%) |

**Abbreviations:** Ct, PCR cycle threshold; PPA, positive percent agreement

TABLE S4

**Table S4.** List of influenza testing results from the prospective specimens using Veritor SARS-CoV-2/Flu and reference methods.

| Specimen ID | Veritor (Flu A) | Veritor (Flu B) | Veritor (SARS-CoV-2) | Lyra (SARS-CoV-2) | Xpert (Flu) |
|-------------|-----------------|-----------------|----------------------|-------------------|-------------|
| 1           | +               | -               | -                    | -                 | -           |
| 2           | -               | +               | -                    | -                 | -           |
| 3           | -               | +               | +                    | +                 | -           |

FIGURE S1

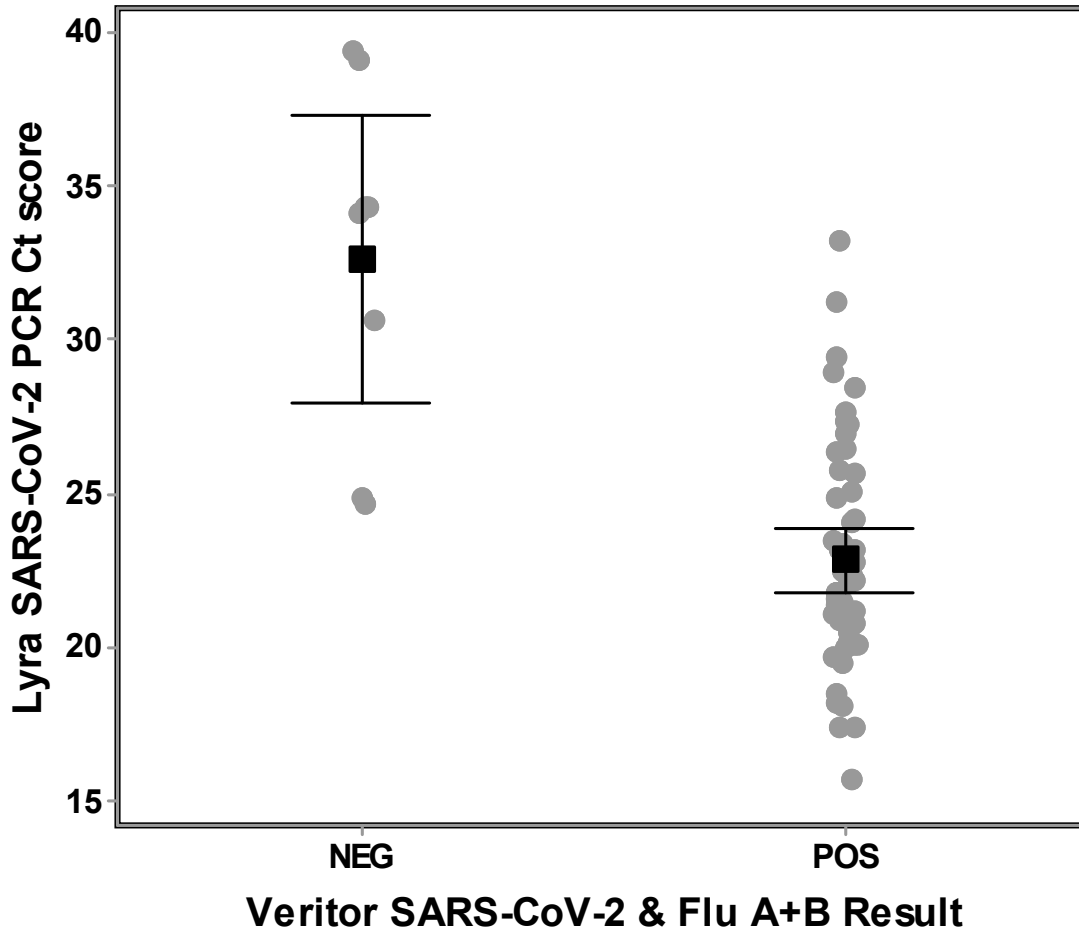

**Figure S1.** Individual plot of Lyra Ct score by Veritor SARS-CoV-2/Flu assay result. Individual negative and positive results for the Veritor SARS-CoV-2/Flu assay are plotted according to the Ct score from the Lyra SARS-CoV-2 PCR assay conducted on specimens obtained from the same individual. The grey circles indicate individual Veritor results. The black box indicates the mean for each group with 95% confidence intervals
